# Supplementary material for: Integrating Epigenetics, Proteomics, and Metabolomics to Reveal the Involvement of Wnt/β-Catenin Signaling Pathway in Oridonin-Induced Reproductive Toxicity
Source: MDPI journal article supplement (doi:10.3390/toxics12050339), 2024-05-07
Supplement: s1 [file s1]

**Table S6.** The names of 20 metabolites corresponding to the IDs

| Index     | Compounds                                                                                                                  | Index     | Compounds                                                                      |
|-----------|----------------------------------------------------------------------------------------------------------------------------|-----------|--------------------------------------------------------------------------------|
| MW0053509 | (1R,5S,8S,9S)-5-hydroxy-11-methyl-6-methylidene-12-oxo-13-oxapentacyclo[9.3.3.15,8.01,10.02,8]octadecane-9-carboxylic acid | MW0103633 | Nicotinate mononucleotide                                                      |
| MW0156802 | Ser-Ile-Phe                                                                                                                | MW0103557 | Flavin adenine dinucleotide                                                    |
| MW0016356 | Canrenone                                                                                                                  | MW0122842 | Amlodipine                                                                     |
| MW0150045 | Glu-Leu                                                                                                                    | MW0158467 | Tyr-Glu-Val-Lys                                                                |
| MW0147502 | Cinnassiol C2                                                                                                              | MW0126337 | Pyridoxamine phosphate                                                         |
| MW0106932 | Glu-Val                                                                                                                    | MW0126258 | Propyl pyrazole triol                                                          |
| MW0141992 | 2,3-bis-O-(geranylgeranyl)-sn-glycerol 1-phosphate                                                                         | MW0054414 | L-Palmitoylcarnitine                                                           |
| MW0158578 | Tyr-Phe-Thr-Lys                                                                                                            | MW0143147 | 4-(3,5-Diphenylcyclohexyl)phenol                                               |
| MW0123028 | Bendamustine hydrochloride                                                                                                 | MW0122512 | 7-methyl-2-morpholino-9-(1-(phenylamino)ethyl)-4H-pyrido[1,2-a]pyrimidin-4-one |
| MW0145782 | Asn-Ile-Arg-Asp                                                                                                            | MW0006517 | CAY10448                                                                       |
